# Supplementary material
Source: PubMed Central journal article supplement (PMC9901219)

# Novel dithiocarbamates selectively inhibit 3CL protease of SARS-CoV-2 and other coronaviruses

*Lucile Brier, Haitham Hassan, Xavier Hanouille, Valerie Landry, Danai Moschidi, Lowiese Desmarets, Yves Rouillé, Julie Dumont, Adrien Herledan, Sandrine Warengem, Catherine Piveteau, Paul Carré, Sarah Ikherbane, François-Xavier Cantrelle, Elian Dupré, Jean Dubuisson, Sandrine Belouzard, Florence Leroux, Benoit Deprez\*, Julie Charton*

## Table of contents

|                                                                                                                      |    |
|----------------------------------------------------------------------------------------------------------------------|----|
| <b>Table 1.</b> The statistics for data collection and refinement.....                                               | S3 |
| <b>Figure S1.</b> Crystallographic structure of the SARS-CoV-2 3CL <sup>pro</sup> after reaction with <b>1x</b> .... | S4 |
| <b>Figure S2.</b> Activity of compounds against MERS-CoV 3CL <sup>pro</sup> .....                                    | S5 |
| <b>NMR spectra of representative compounds</b> .....                                                                 | S6 |

**Table 1.** The statistics for data collection and refinement

| Protein                                                          | 3CLp with compound 1                                  | 3CLp with compound 1x                                  |
|------------------------------------------------------------------|-------------------------------------------------------|--------------------------------------------------------|
| PDB code                                                         | 7NTQ                                                  | 8AEB                                                   |
| <b>Data collection statistics</b>                                |                                                       |                                                        |
| X-ray source                                                     | SOLEIL Proxima1                                       | SOLEIL Proxima2a                                       |
| Wavelength (Å)                                                   | 0,978564                                              | 0,980104                                               |
| Solvent content (%)                                              | 37,56                                                 | 38,26                                                  |
| Space group                                                      | C 1 2 1                                               | C 1 2 1                                                |
| Unit cell dimensions (Å)                                         | a=114.92<br>b=52.91<br>c=44.90                        | a=115.14<br>b=53.47<br>c=44.65                         |
| Unit cell angles (°)                                             | $\alpha$ =90.00<br>$\beta$ =102.88<br>$\gamma$ =90.00 | $\alpha$ =90.00<br>$\beta$ =102.130<br>$\gamma$ =90.00 |
| Resolution range (Å)*                                            | 47.62 - 1.49 (1.59 - 1.49)                            | 48.37 - 1.83 (1.88 - 1.83)                             |
| N° observations                                                  | 282693 (41311)                                        | 145658 (9493)                                          |
| N° unique reflections                                            | 42066 (6311)                                          | 23313 (1587)                                           |
| <i>R</i> <sub>meas</sub>                                         | 0.101 (1.406)                                         | 0.111 (1.464)                                          |
| Completeness (%)                                                 | 98.7 (91.9)                                           | 98.7 (89.8)                                            |
| Mean <i>I</i> / $\sigma$ ( <i>I</i> )                            | 9.77 (1.02)                                           | 9.9 (1.20)                                             |
| Multiplicity                                                     | 6.9 (7.0)                                             | 6.2 (6.0)                                              |
| CC1/2 <sup>a</sup>                                               | 0.998 (0.510)                                         | 0.997 (0.476)                                          |
| Wilson B-factor (Å <sup>2</sup> )                                | 22,3                                                  | 25,0                                                   |
| <b>Refinement statistics</b>                                     |                                                       |                                                        |
| <i>R</i> <sub>work</sub> / <i>R</i> <sub>free</sub> <sup>b</sup> | 0.171 / 0.213                                         | 0.183 / 0.234                                          |
| Average B, all atoms (Å <sup>2</sup> )                           | 25,0                                                  | 34,0                                                   |
| Clashscore <sup>c</sup>                                          | 3                                                     | 5                                                      |
| No. non-H atoms                                                  | 2636                                                  | 2505                                                   |
| Protein                                                          | 2366                                                  | 2355                                                   |
| Ligand/ion                                                       | 54                                                    | 22                                                     |
| Water                                                            | 216                                                   | 128                                                    |
| <b>R.m.s. deviations</b>                                         |                                                       |                                                        |
| Bond lengths (Å)                                                 | 0,0107                                                | 0,0144                                                 |
| Bond angles (°)                                                  | 1,675                                                 | 2,067                                                  |
| <b>Ramachandran</b>                                              |                                                       |                                                        |
| favored                                                          | 98,36                                                 | 97,37                                                  |
| allowed                                                          | 0,98                                                  | 1,97                                                   |
| outliers                                                         | 0,33                                                  | 0,65                                                   |

\*Values in parentheses are for highest-resolution shell.

<sup>a</sup> percentage of correlation between intensities from random half-datasets. Karplus & Diederichs (2012), Science 336, 1030-33

<sup>b</sup> calculated for a test set of reflections (5%) omitted from the refinement.

<sup>c</sup> defined as the number of clashes calculated for the model per 1000 atoms (including H) of the model. Hydrogens were added by MolProbity (Chen et al., 2010)

**Figure S1.** Crystallographic structure of the SARS-CoV-2 3CL<sup>pro</sup> after reaction with **1x**

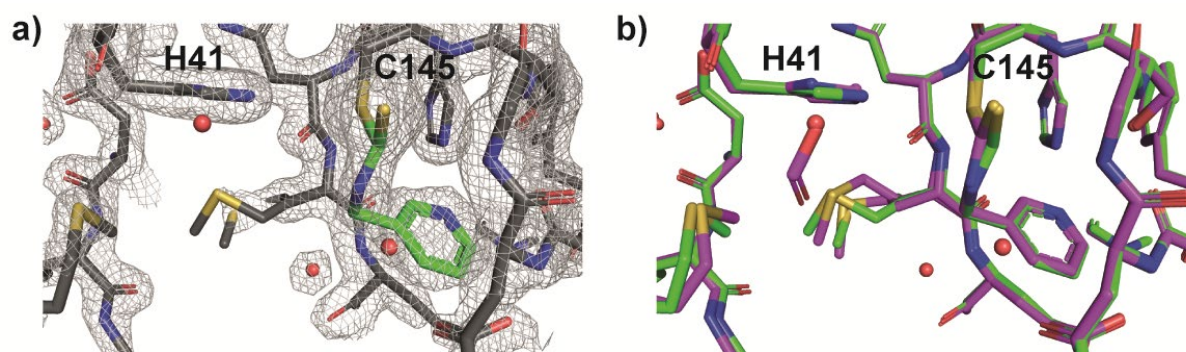

(a) Crystallographic structure of the SARS-CoV-2 3CL<sup>pro</sup> bound to the N-(pyridin-3-ylmethyl)thioformamide moiety (in green) from the compound **1x** (PDB ID: 8AEB). The  $2F_o-F_c$  electron-density map, contoured at  $1.5\sigma$ , is shown as light grey mesh. (b) Superimposition of the structures of the SARS-CoV-2 3CL<sup>pro</sup> bound to the N-(pyridin-3-ylmethyl)thioformamide moiety coming either from the compound **1** (in magenta) or from the compound **1x** (in green).

**Figure S2. Activity of compounds against MERS-CoV 3CL<sup>pro</sup>**

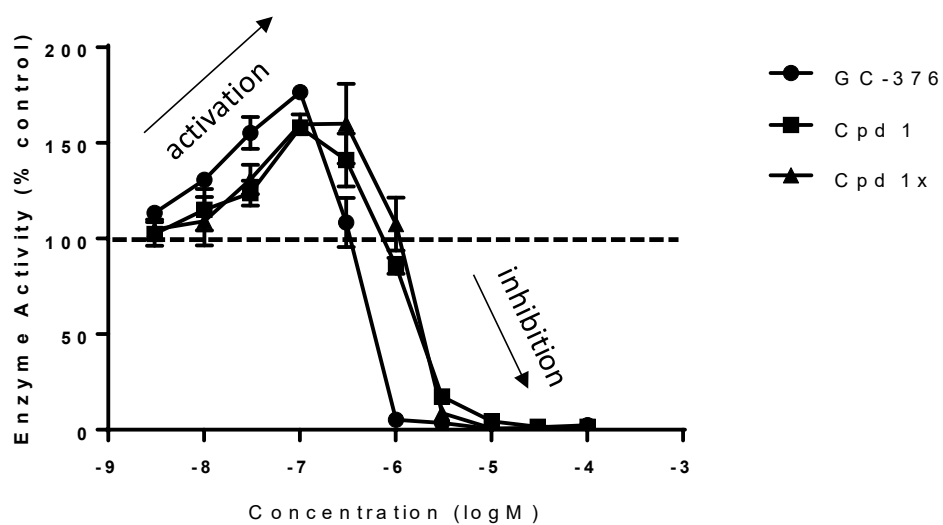

Enzymatic assays were performed without GSH in the buffer. The enzyme was pre-incubated for 1h with compound at increasing concentrations before starting the reaction with the substrate. Initial rates were expressed as percentage of control. Data are the mean of three separate experiments.

## NMR spectra of representative compounds

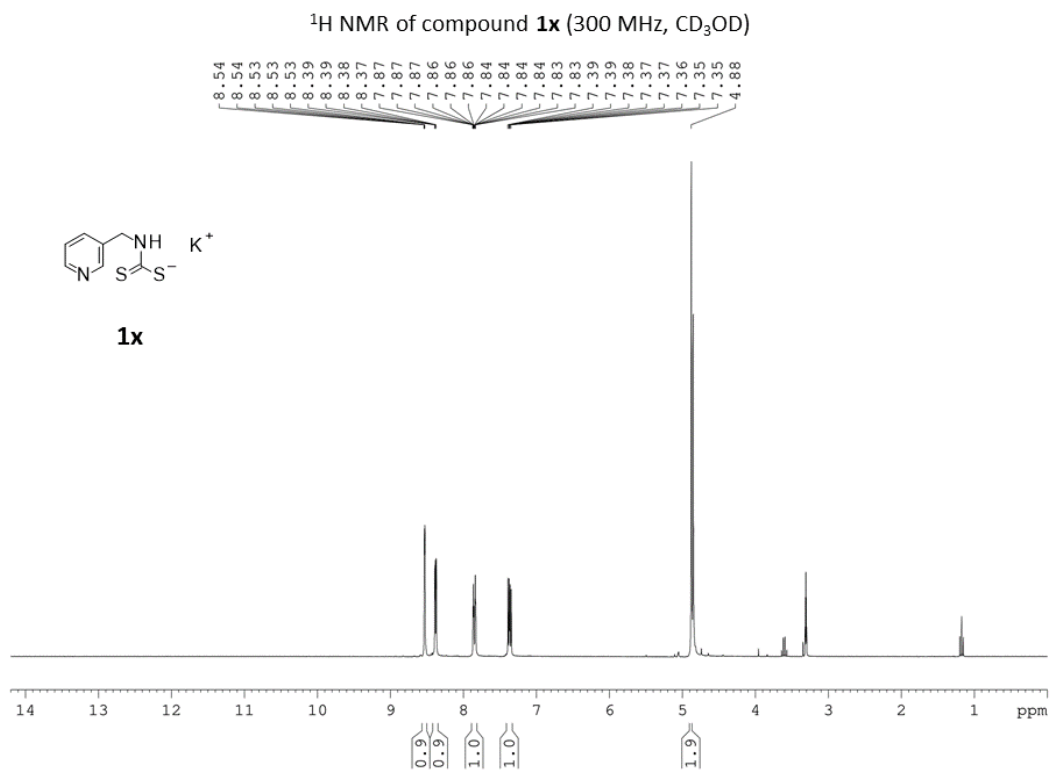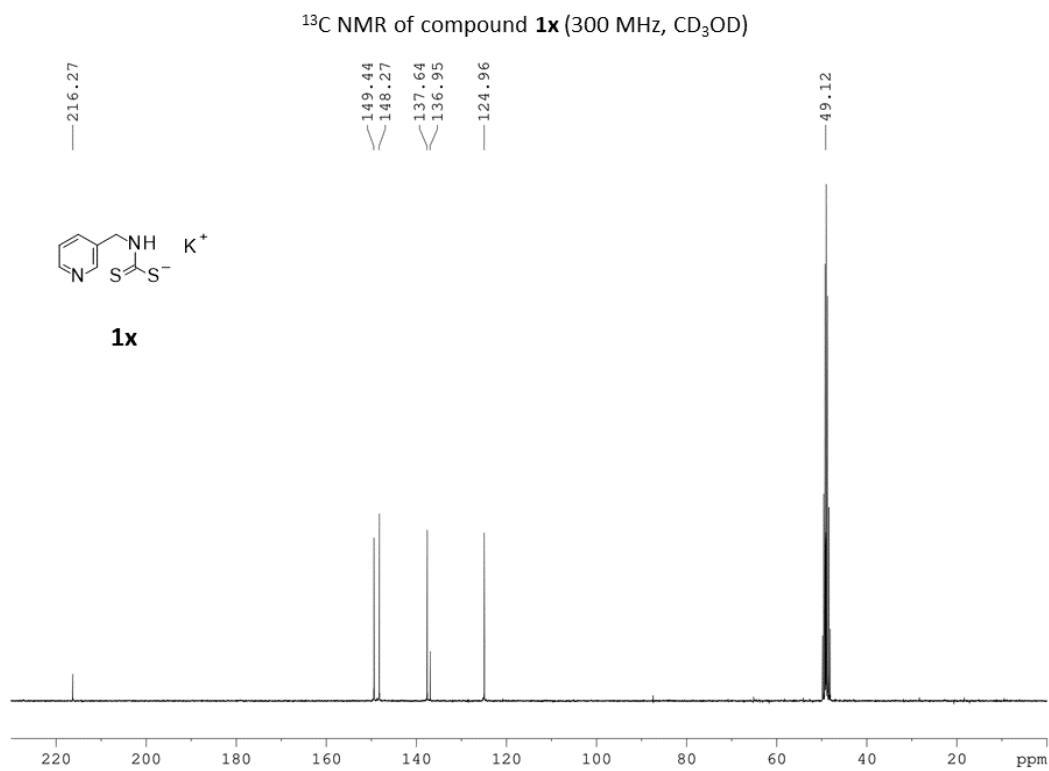

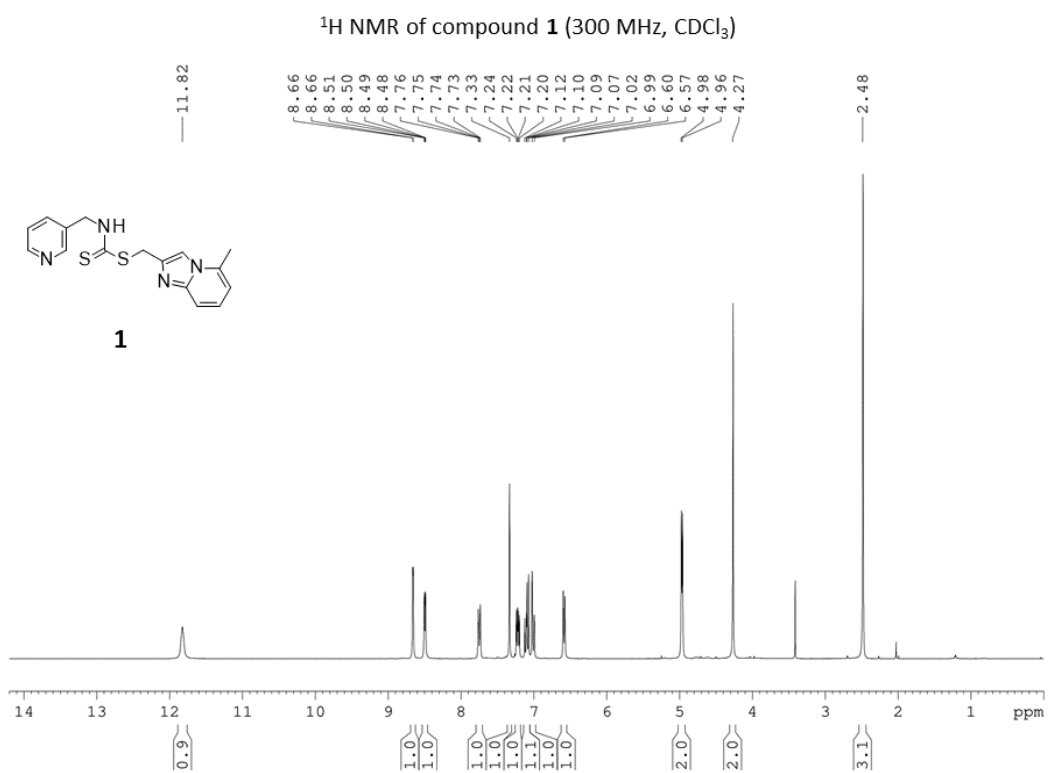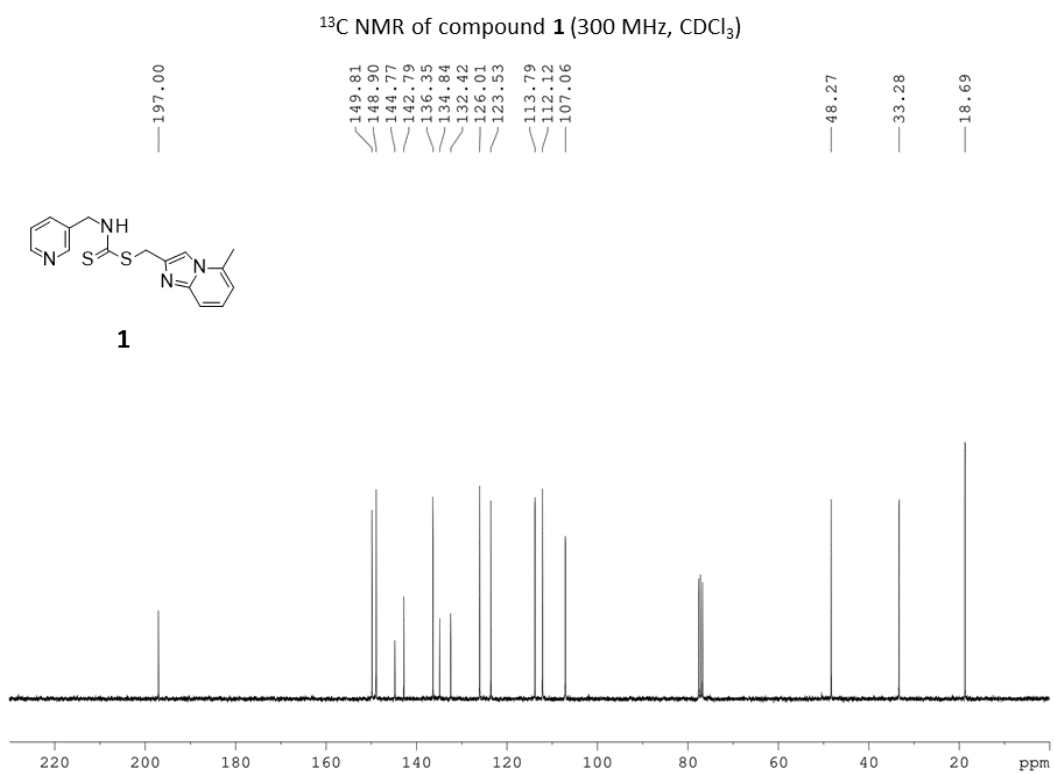

<sup>1</sup>H NMR of compound **1A** (300 MHz, CDCl<sub>3</sub>)

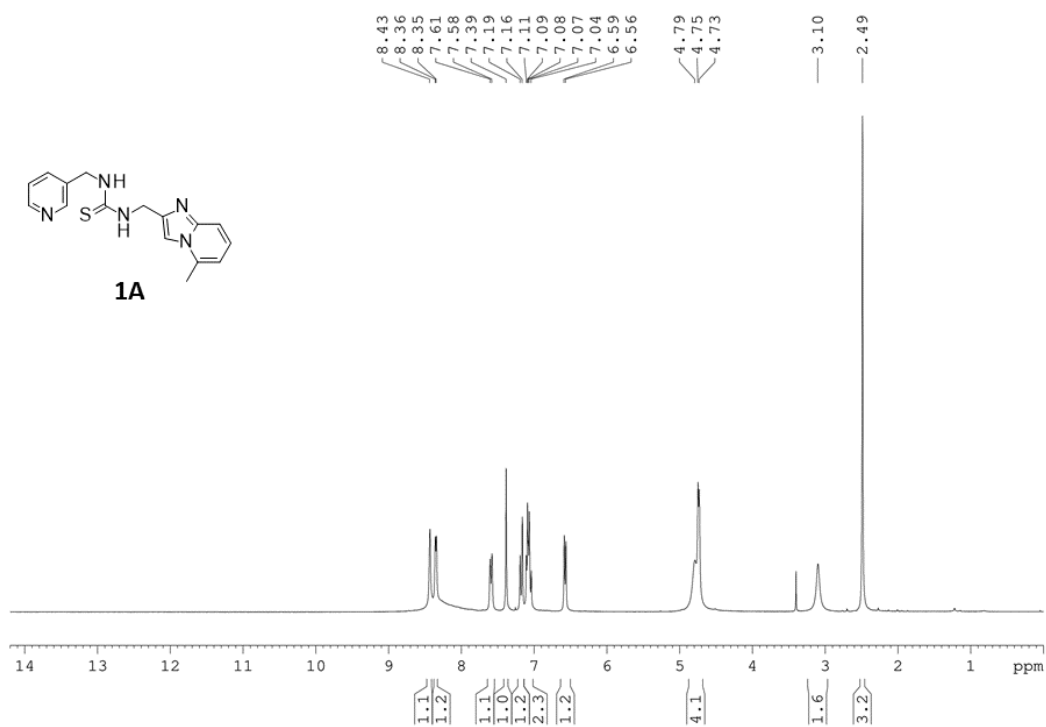

<sup>13</sup>C NMR of compound **1A** (300 MHz, CDCl<sub>3</sub>)

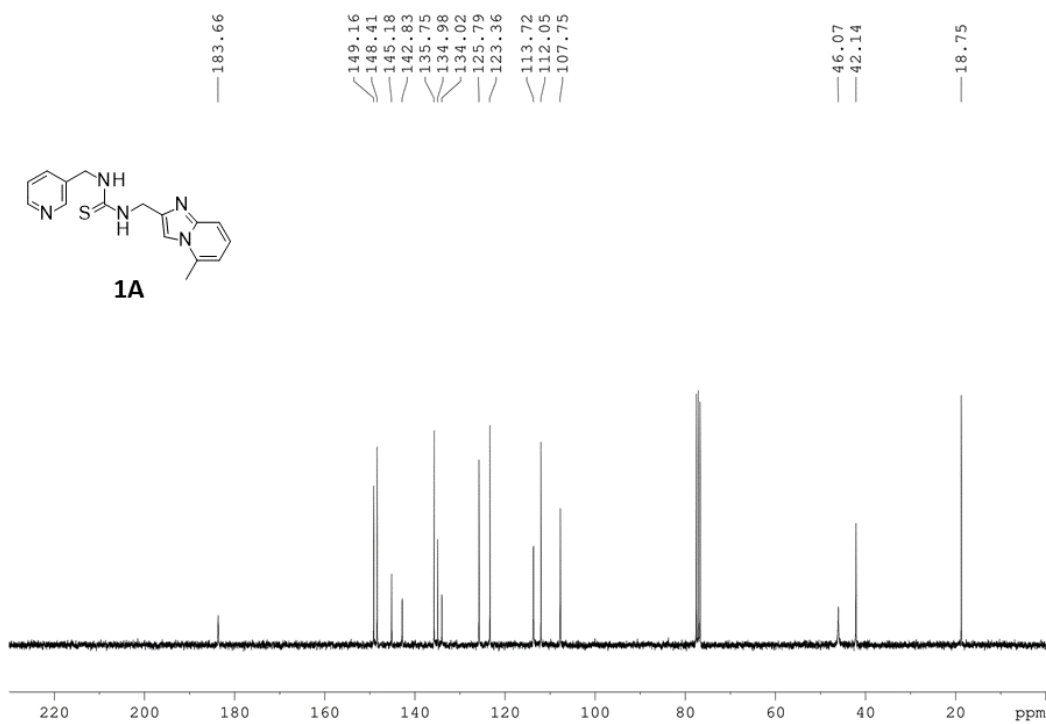



$^1\text{H}$  NMR of compound **1B** (300 MHz,  $\text{CD}_3\text{OD}$ )

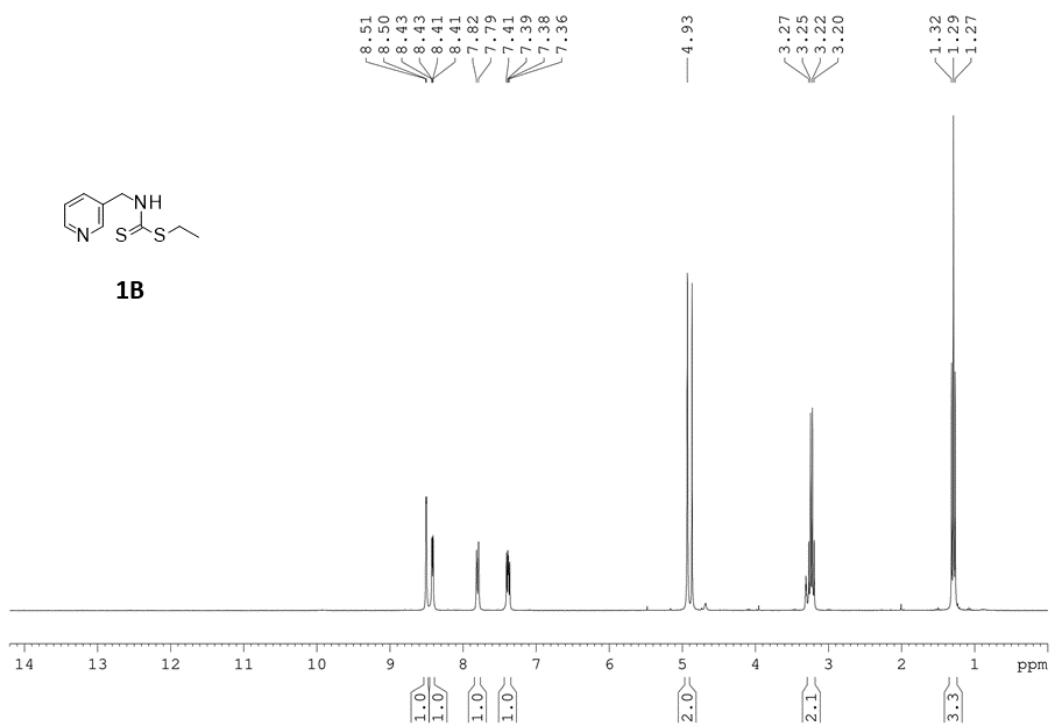

$^{13}\text{C}$  NMR of compound **1B** (300 MHz,  $\text{CD}_3\text{OD}$ )

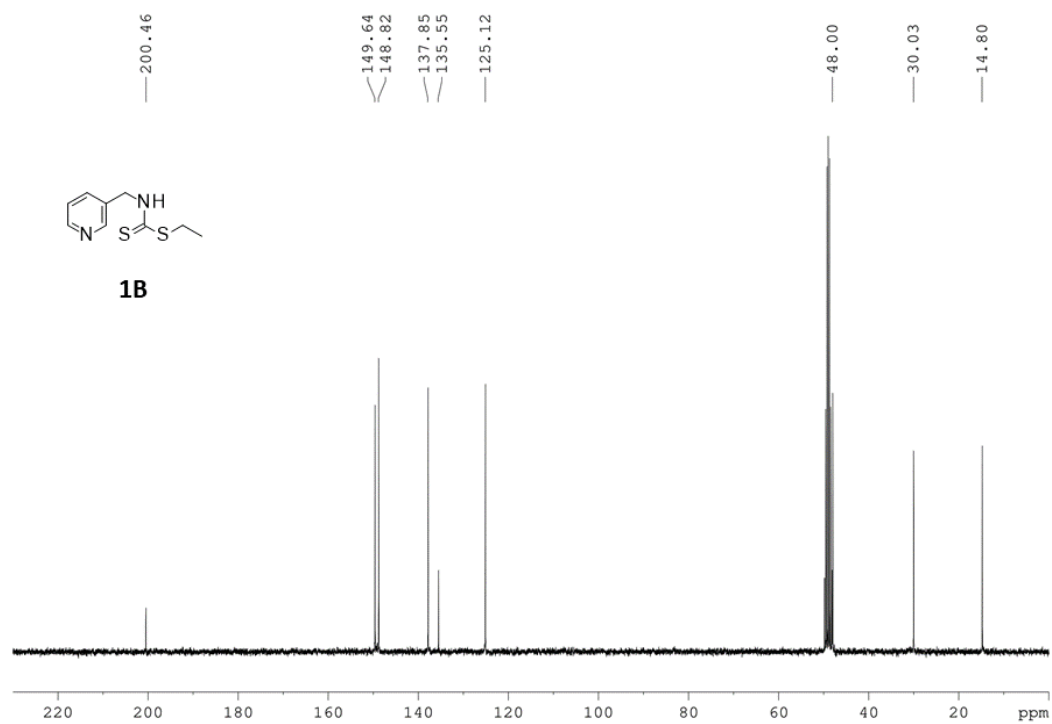

<sup>1</sup>H NMR of compound **1C** (300 MHz, CD<sub>3</sub>OD)

8.50  
8.49  
8.42  
8.41  
8.40  
8.40  
7.79  
7.79  
7.78  
7.77  
7.76  
7.75  
7.38  
7.36  
7.35  
7.33  
7.33  
7.29  
7.28  
7.27  
7.27  
7.26  
7.25  
7.23  
7.23  
7.22  
7.22  
7.21  
7.20  
7.18  
4.93  
4.54

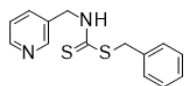

**1C**

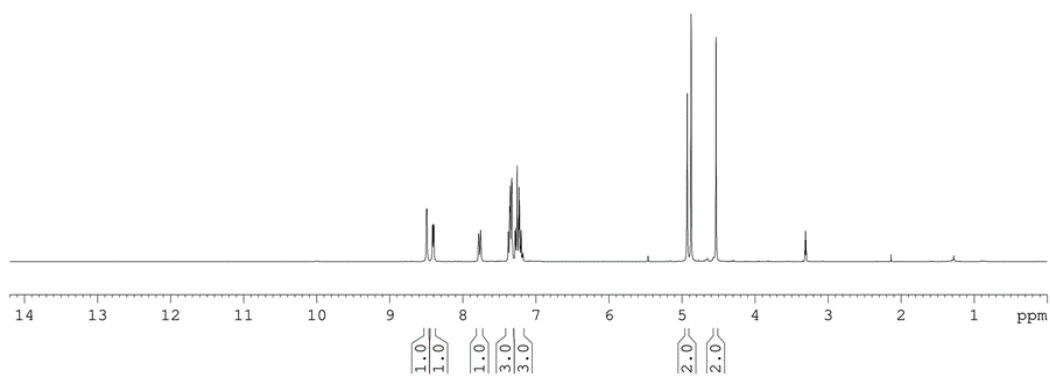

<sup>13</sup>C NMR of compound **1C** (300 MHz, CD<sub>3</sub>OD)

199.88

149.63  
148.84  
138.44  
137.86  
135.38  
130.09  
129.48  
128.30  
125.14

48.31

40.33

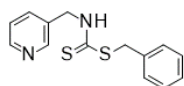

**1C**

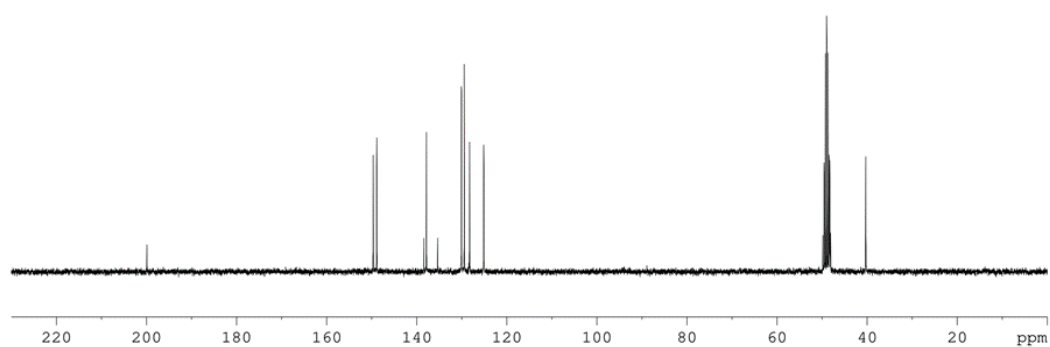

<sup>1</sup>H NMR of compound **1D** (300 MHz, CDCl<sub>3</sub>)

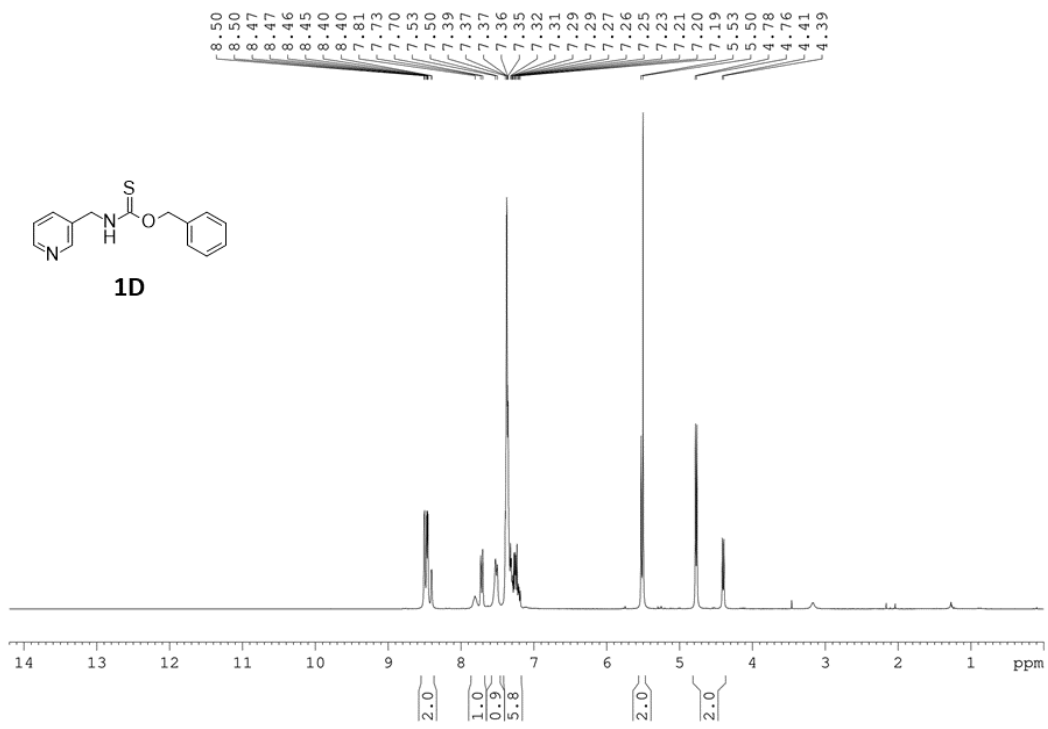

<sup>13</sup>C NMR of compound **1D** (300 MHz, CDCl<sub>3</sub>)

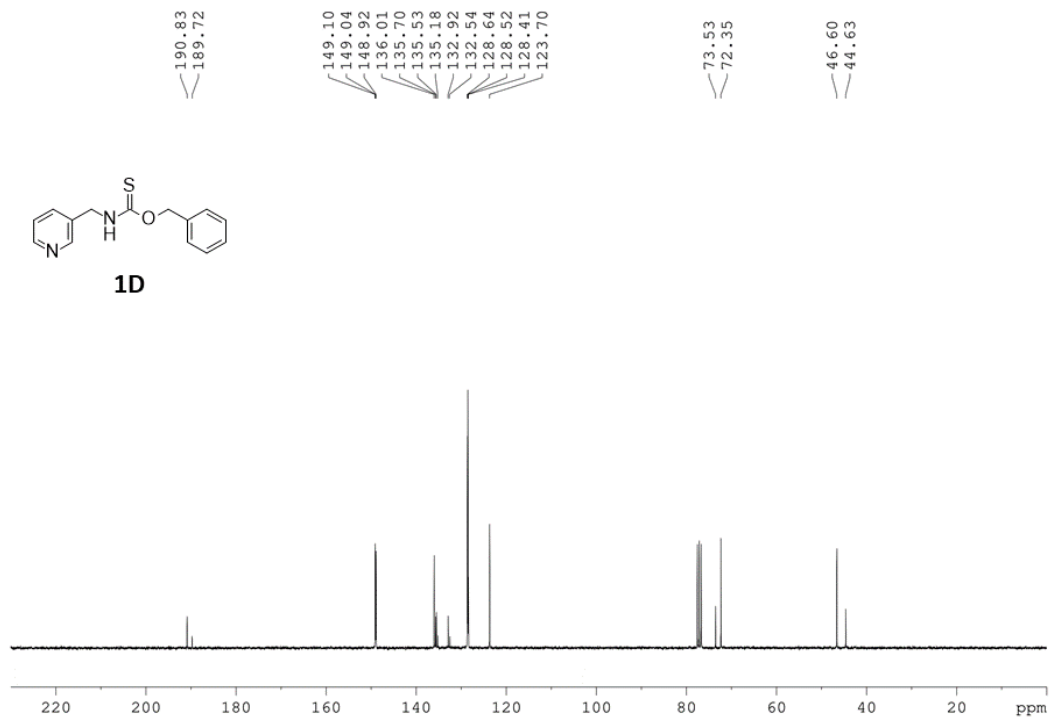

Supplement: mmc1.pdf [file mmc1.pdf]
